# Supplementary material for: Effectiveness of Curcumin on Outcomes of Hospitalized COVID-19 Patients: A Systematic Review of Clinical Trials
Source: Nutrients. 2022 Jan 7;14(2):256. doi: 10.3390/nu14020256 (PMC8779570; doi:10.3390/nu14020256)
Supplement: Supplementary file 1 [file nutrients-14-00256-s001.zip › Supplementary File S1.pdf]

# Supplementary file S1

**Scopus: 34** ( TITLE ( "Novel coronavirus" OR "Novel coronavirus 2019" OR "2019 novel coronavirus" OR "2019 nCoV" OR "Wuhan coronavirus" OR "Wuhan pneumonia" OR covid-19 OR "2019-nCoV" OR "SARS-CoV-2" OR "coronavirus 2019" OR "2019-nCoV" ) AND TITLE ( Nano-curcumin OR curcumin OR curcuminoid OR curcuminoids ) )

**Pubmed: 39** ("Novel coronavirus"[Title] OR "Novel coronavirus 2019"[Title] OR "2019 novel coronavirus"[Title] OR "2019 nCoV"[Title] OR "Wuhan coronavirus"[Title] OR "Wuhan pneumonia"[Title] OR covid-19 OR "2019-nCoV"[Title] OR "SARS-CoV-2"[Title] OR "coronavirus 2019"[Title] OR "2019-nCoV"[Title]) AND (curcumin [Title] OR curcuminoid [Title] OR curcuminoids[Title])

**Proquest: 8** ti("Novel coronavirus" OR "Novel coronavirus 2019" OR "2019 novel coronavirus" OR "2019 nCoV" OR "Wuhan coronavirus" OR "Wuhan pneumonia" OR covid-19 OR "2019-nCoV" OR "SARS-CoV-2" OR "coronavirus 2019" OR "2019-nCoV") AND ti(curcumin OR curcuminoid OR curcuminoids )

## Wos

|                                                                                                                                                                                                                                                                                                                                                                                                                                                                                                                                       |        |
|---------------------------------------------------------------------------------------------------------------------------------------------------------------------------------------------------------------------------------------------------------------------------------------------------------------------------------------------------------------------------------------------------------------------------------------------------------------------------------------------------------------------------------------|--------|
| <b>TITLE:</b> ("Novel coronavirus") OR <b>TITLE:</b> ("Novel coronavirus 2019") OR <b>TITLE:</b> ("2019 novel coronavirus") OR <b>TITLE:</b> ("2019 nCoV") OR <b>TITLE:</b> ("Wuhan coronavirus") OR <b>TITLE:</b> ("Wuhan pneumonia") OR <b>TITLE:</b> (covid-19) OR <b>TITLE:</b> ("2019-nCoV") OR <b>TITLE:</b> ("SARS-CoV-2") OR <b>TITLE:</b> ("coronavirus 2019") OR <b>TOPIC:</b> ("2019-nCoV")<br><i>Indexes=SCI-EXPANDED, SSCI, A&amp;HCI, CPCI-S, CPCI-SSH, BKCI-S, BKCI-SSH, ESCI, CCR-EXPANDED, IC Timespan=All years</i> | 124943 |
| <b>TITLE:</b> (curcumin) OR <b>TITLE:</b> (curcuminoid) OR <b>TITLE:</b> (curcuminoids)<br><i>Indexes=SCI-EXPANDED, SSCI, A&amp;HCI, CPCI-S, CPCI-SSH, BKCI-S, BKCI-SSH, ESCI, CCR-EXPANDED, IC Timespan=All years</i>                                                                                                                                                                                                                                                                                                                | 16028  |
| <b>#2 AND #1</b><br><i>Indexes=SCI-EXPANDED, SSCI, A&amp;HCI, CPCI-S, CPCI-SSH, BKCI-S, BKCI-SSH, ESCI, CCR-EXPANDED, IC Timespan=All years</i>                                                                                                                                                                                                                                                                                                                                                                                       | 25     |

## Embase

|                                                                                                                                                                                                                                         |        |
|-----------------------------------------------------------------------------------------------------------------------------------------------------------------------------------------------------------------------------------------|--------|
| 'novel coronavirus':ti OR 'novel coronavirus 2019':ti OR '2019 novel coronavirus':ti OR '2019 ncov':ti OR 'wuhan coronavirus':ti OR 'wuhan pneumonia':ti OR 'covid 19':ti OR 'sars-cov-2':ti OR 'coronavirus 2019':ti OR '2019-ncov':ti | 123566 |
| curcuminoids:ti OR curcuminoid:ti OR curcumin:ti                                                                                                                                                                                        | 14881  |
| #2 AND #1                                                                                                                                                                                                                               | 28     |

## Ovid

|                                                                                                                                                                                                                              |       |
|------------------------------------------------------------------------------------------------------------------------------------------------------------------------------------------------------------------------------|-------|
| ("Novel coronavirus" or "Novel coronavirus 2019" or "2019 novel coronavirus" or "2019 nCoV" or "Wuhan coronavirus" or "Wuhan pneumonia" or covid-19 or "2019-nCoV" or "SARS-CoV-2" or "coronavirus 2019" or "2019-nCoV").ti. | 31414 |
| (curcumin or curcuminoid or curcuminoids).ti.                                                                                                                                                                                | 2563  |
| 1 and 2                                                                                                                                                                                                                      | 7     |
