# Supplementary material for: Effectiveness of Curcumin on Outcomes of Hospitalized COVID-19 Patients: A Systematic Review of Clinical Trials
Source: Nutrients. 2022 Jan 7;14(2):256. doi: 10.3390/nu14020256 (PMC8779570; doi:10.3390/nu14020256)
Supplement: Supplementary file 1 [file nutrients-14-00256-s001.zip › Supplementary File S2.pdf]

## Supplementary file S2

**Table S1: Methodological quality assessment for RCTs included studies using the Jadad rating scale**

| First Author, Year, Ref   | Randomization              |                                 | Blinding               |                                          | Withdrawals and dropouts              | Total score |
|---------------------------|----------------------------|---------------------------------|------------------------|------------------------------------------|---------------------------------------|-------------|
|                           | Randomization is mentioned | The randomization was adequate? | Blinding is mentioned? | The blinding of methodology was correct? | Losses and exclusions were described? |             |
| Ahmadi, 2020, (1)         | 1                          | 1                               | 1                      | 1                                        | 1                                     | 5           |
| Pawar, 2020, (2)          | 1                          | 1                               | 1                      | 1                                        | 1                                     | 5           |
| Saber-Moghadam, 2020, (3) | 0                          | 0                               | 1                      | 1                                        | 1                                     | 3           |
| Valizadeh, 2020, (4)      | 1                          | 0                               | 1                      | 0                                        | 1                                     | 3           |
| Tahmasebi, 2020, (5)      | 1                          | 1                               | 1                      | 1                                        | 1                                     | 5           |
| Tahmasebi, 2020, (6)      | 1                          | 1                               | 1                      | 0                                        | 1                                     | 4           |

1. Ahmadi R, Salari S, Sharifi MD, Reihani H, Rostamiani MB, Behmadi M, et al. Oral nano-curcumin formulation efficacy in the management of mild to moderate outpatient COVID-19: A randomized triple-blind placebo-controlled clinical trial. Food Science & Nutrition. 2021;n/a(n/a).
2. Pawar KS, Mastud RN, Pawar SK, Pawar SS, Bhoite RR, Bhoite RR, et al. Oral Curcumin With Piperine as Adjuvant Therapy for the Treatment of COVID-19: A Randomized Clinical Trial. Frontiers in pharmacology. 2021;12:669362.
3. Saber-Moghaddam N, Salari S, Hejazi S, Amini M, Taherzadeh Z, Eslami S, et al. Oral nano-curcumin formulation efficacy in management of mild to moderate hospitalized coronavirus disease-19 patients: An open label nonrandomized clinical trial. Phytotherapy research : PTR. 2021.
4. Valizadeh H, Abdolmohammadi-Vahid S, Danshina S, Ziya Gencer M, Ammari A, Sadeghi A, et al. Nano-curcumin therapy, a promising method in modulating inflammatory cytokines in COVID-19 patients. International immunopharmacology. 2020;89(Pt B):107088.
5. Tahmasebi S, El-Esawi MA, Mahmoud ZH, Timoshin A, Valizadeh H, Roshangar L, et al. Immunomodulatory effects of nanocurcumin on Th17 cell responses in mild and severe COVID-19 patients. Journal of Cellular Physiology. 2021;236(7):5325-38.
6. Tahmasebi S, Saeed BQ, Temirgalieva E, Yumashev AV, El-Esawi MA, Navashenag JG, et al. Nanocurcumin improves Treg cell responses in patients with mild and severe SARS-CoV2. Life Sciences. 2021;276:119437.
